# Supplementary material for: Potential of mid-infrared spectroscopy as a non-invasive diagnostic test in urine for endometrial or ovarian cancer
Source: Royal Society of Chemistry journal article supplement (doi:10.1039/c8an00027a), 2018-01-01
Supplement: c8an00027a1.pdf [file c8an00027a1.pdf]

## **Supplementary Material**

### **Potential of mid-infrared spectroscopy as a non-invasive diagnostic test for endometrial or ovarian cancer in urine**

Maria Paraskevaïdi<sup>a,1</sup>, Camilo L.M. Morais<sup>a,b</sup>, Kássio M.G. Lima<sup>b</sup>, Katherine M. Ashton<sup>c</sup>, Helen F. Stringfellow<sup>c</sup>, Pierre L. Martin-Hirsch<sup>d</sup> and Francis L. Martin<sup>a,1</sup>

*<sup>a</sup>School of Pharmacy and Biomedical Sciences, University of Central Lancashire, Preston PR1 2HE, UK; <sup>b</sup>Institute of Chemistry, Biological Chemistry and Chemometrics, Federal University of Rio Grande do Norte, Natal 59072-970, Brazil; <sup>c</sup>Pathology Department, Lancashire Teaching Hospitals NHS Foundation, Preston PR2 9HT, UK; <sup>d</sup>Department of Obstetrics and Gynaecology, Lancashire Teaching Hospitals NHS Foundation, Preston PR2 9HT, UK*

<sup>1</sup>To whom correspondence should be addressed. Email: [mparaskevaïdi@uclan.ac.uk](mailto:mparaskevaïdi@uclan.ac.uk) or [flmartin@uclan.ac.uk](mailto:flmartin@uclan.ac.uk); Tel: +44 (0) 1772 89 6482

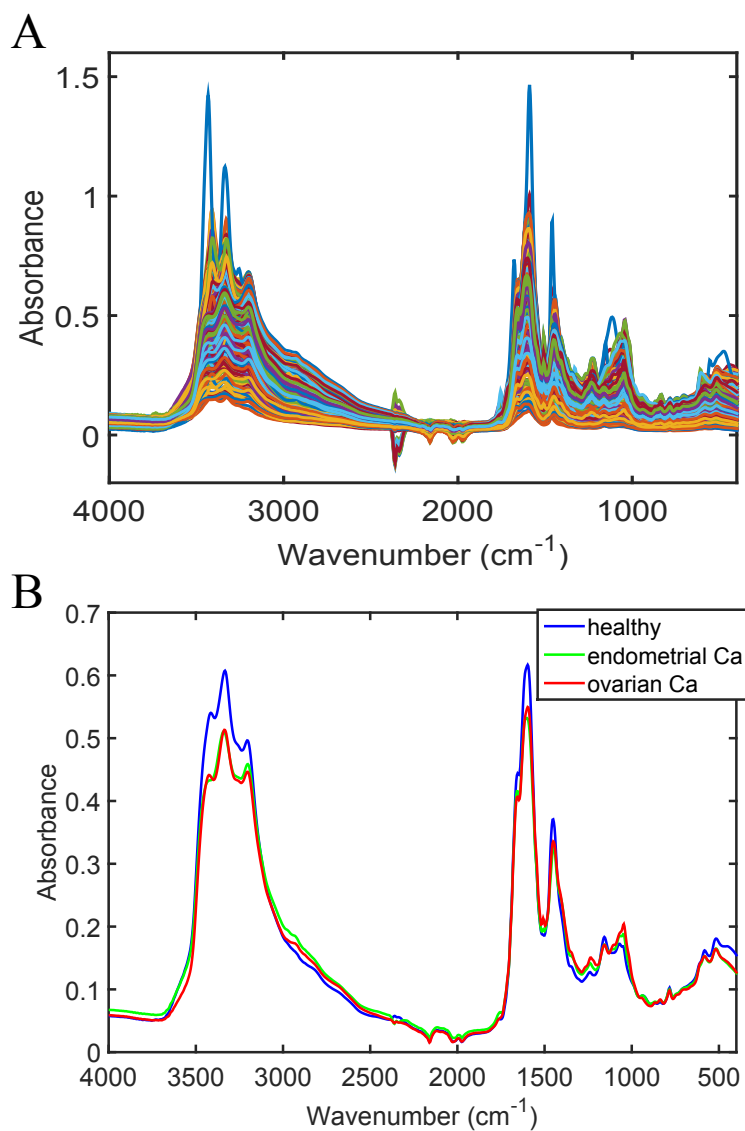

**Supplementary Fig. 1:** A) Raw spectra for all samples analysed (healthy, endometrial and ovarian cancer). (B) Average raw spectrum for healthy, endometrial and ovarian cancer groups.

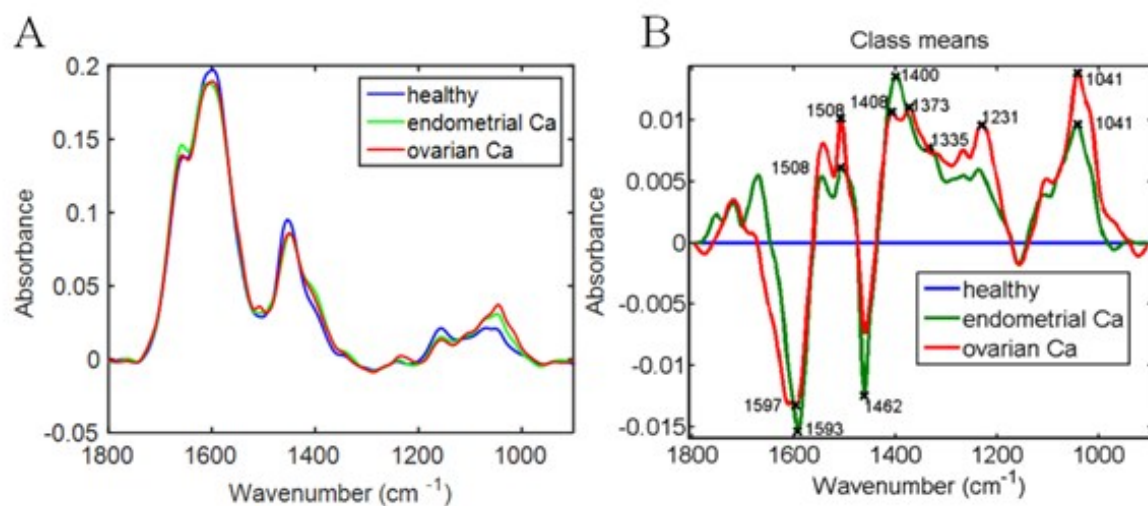

**Supplementary Fig. 2:** Pre-processed spectra (A); Top six peaks that were found responsible for the discrimination between endometrial and ovarian cancer from healthy individuals (B).

**Supplementary Table 1:** Correct classification (%) of training and test set using PLS-DA, PCA-SVM and GA-LDA algorithms.

| Algorithm | Training set (%) | Test set (%) |
|-----------|------------------|--------------|
| PLS-DA    | 85.0             | 72.5         |
| PCA-SVM   | 97.2             | 95.8         |
| GA-LDA    | 95.0             | 90.0         |

PLS-DA: Partial Least Squares-Discriminant Analysis; PCA-SVM: Principal Component Analysis-Support Vector Machines; GA-LDA: Genetic Algorithm-Linear Discriminant Analysis
